# Supplementary material
Source: Springer Nature journal article supplement (https://www.springermedizin.de/resource/supplementary/12993_2007_142_MOESM12_ESM.pdf/9617294)

# SII Predicted Stimulus Response

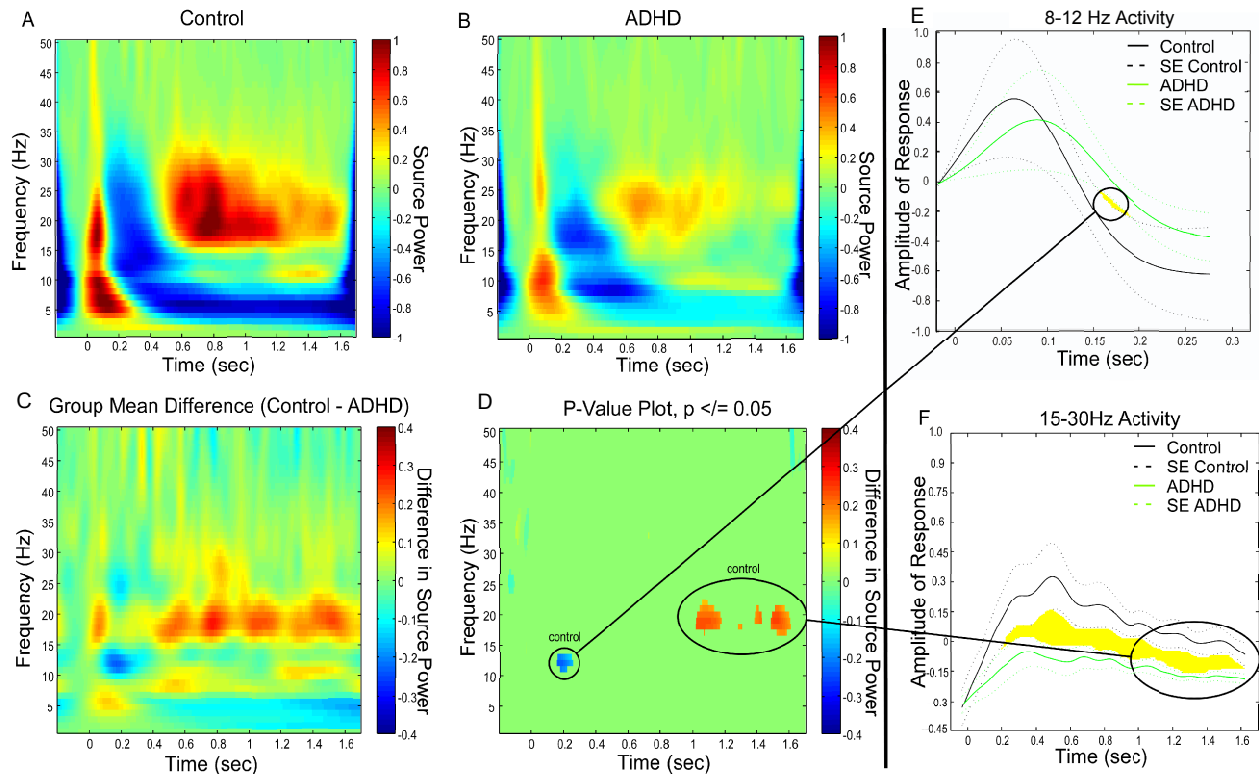

Supplement: MOESM12 [file 9617294]
